# Supplementary material for: Thermochromic properties of acridine heterocyclic derivatives with a donor–acceptor configuration
Source: Royal Society of Chemistry journal article supplement (doi:10.1039/d2nj02881f), 2022-01-01
Supplement: d2nj02881f1.pdf [file d2nj02881f1.pdf]

## Supplementary Information

### Thermochromic properties of acridine heterocyclic derivatives with donor-acceptor configuration

Shuzhe Li<sup>1</sup>, Tong Sun<sup>3</sup>, Yixiao Niu<sup>2</sup>, Yuhe Tian<sup>1</sup>, Limin Yan<sup>1,\*</sup>, Wei Shi<sup>2,\*</sup>, Xuyong Yang<sup>2</sup>, Bin Wei<sup>1,2</sup>

<sup>1</sup> Microelectronic R&D Center, School of Mechanical & Electronic Engineering and Automation, Shanghai University, Shanghai, 200072, China

<sup>2</sup> School of Mechatronic Engineering and Automation, Key Laboratory of Advanced Display and System Applications, Ministry of Education, Shanghai University, 200072, China

<sup>3</sup> School of Materials Science and Engineering, Shanghai University, Shanghai, 200072, China

\*Corresponding author: Limin Yan, Wei Shi

E-mail address: yanlm@shu.edu.cn; shiwei@shu.edu.cn

#### Contents

Fig. S1. PL spectra of thermally evaporated DpAn-InAc film and DpAn-InAc toluene solution (tested at 77 K), and UV-Visible absorption spectra (Abs.) of DpAn-InAc toluene solution tested at room temperature.

Fig. S2. PL spectra of thermally evaporated DpAn-BzAc and DpAn-BzAc toluene solution (tested at 77 K), and UV-Visible absorption spectra (Abs.) of toluene solution tested at room temperature (RT) and 77 K.

Fig. S3. Transient decay curves of DpAn-InAc and DpAn-BzAc films at room temperature.

Fig. S4. Characteristics of DpAn-InAc film dissolved in para-xylene. (a) PL spectra, (b) transmittance, and (c–e) AFM images (4×4 μm) in pristine and annealed states.

Fig. S5. Characteristics of DpAn-BzAc film. (a–c) PL spectra, (d–f) transmittance, and (g–i) AFM images (4×4 μm) in pristine and annealed states. The solvent is (a, d, g) toluene, (b, e, h) chloroform, and (c, f, i) acetonitrile.

Table S1. Parameters of DpAn-InAc and DpAn-BzAc.

**Fig. S1.** PL spectra of thermally evaporated DpAn-InAc film and DpAn-InAc toluene solution (tested at 77 K), and UV-Visible absorption spectra (Abs.) of DpAn-InAc toluene solution tested at room temperature.

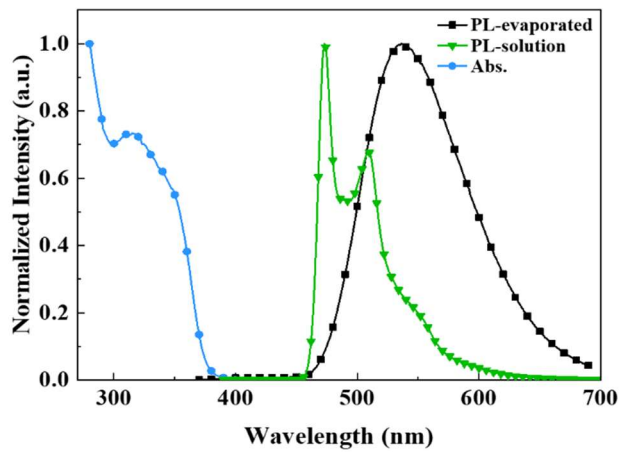

**Fig. S2.** PL spectra of thermally evaporated DpAn-BzAc and DpAn-BzAc toluene solution (tested at 77 K), and UV-Visible absorption spectra (Abs.) of toluene solution tested at room temperature (RT) and 77 K.

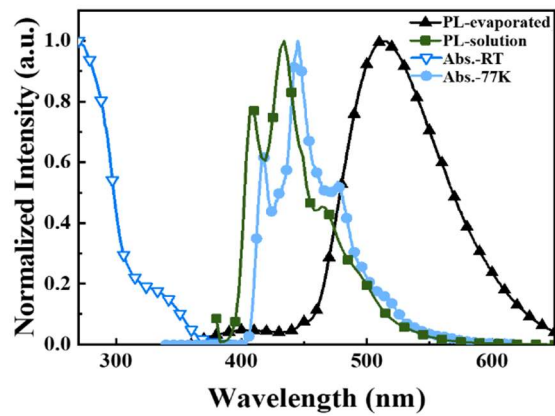

**Fig. S3.** Transient decay curves of DpAn-InAc and DpAn-BzAc films at room temperature.

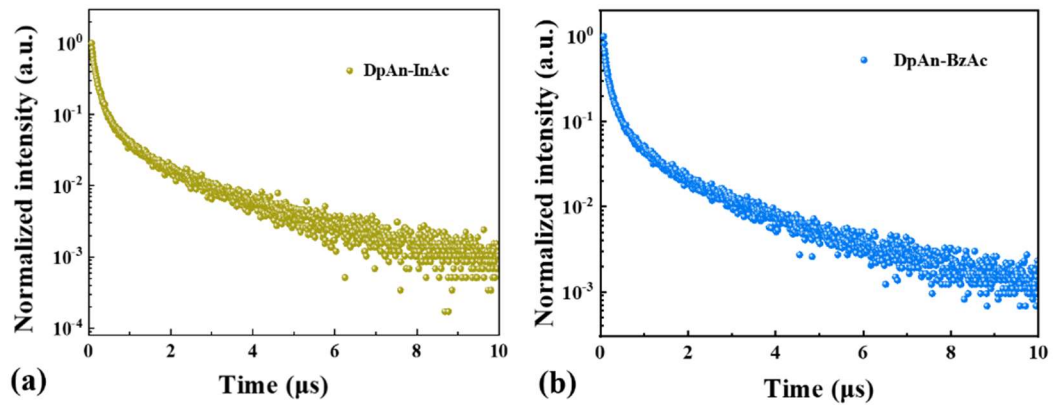

**Fig. S4.** Characteristics of DpAn-InAc film dissolved in para-xylene. (a) PL spectra, (b) transmittance, and (c–e) AFM images ( $4 \times 4 \mu\text{m}$ ) in pristine and annealed state.

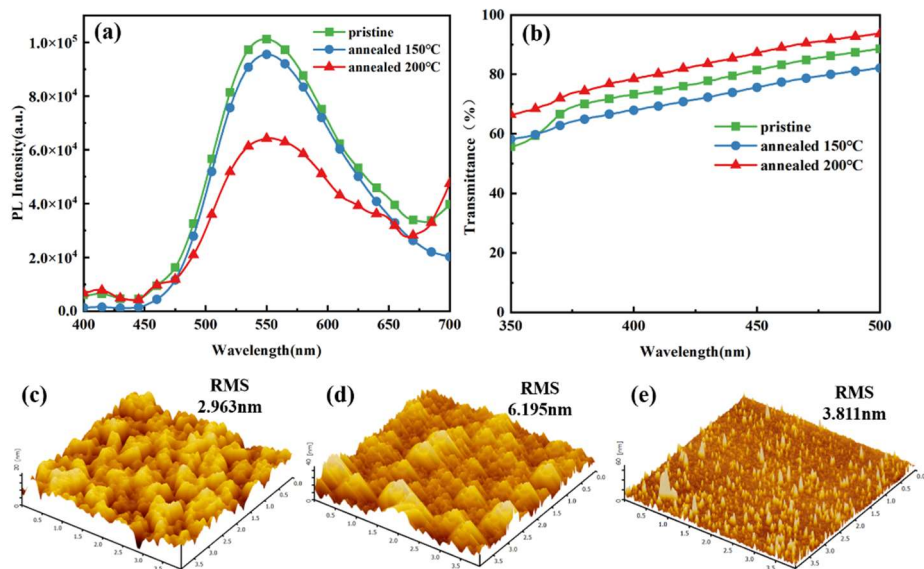

**Fig. S5.** Characteristics of DpAn-BzAc film. (a–c) PL spectra, (d–f) transmittance, and (g–i) AFM images ( $4 \times 4 \mu\text{m}$ ) in pristine and annealed state. The solvent is (a, d, g) toluene, (b, e, h) chloroform, and (c, f, i) acetonitrile.

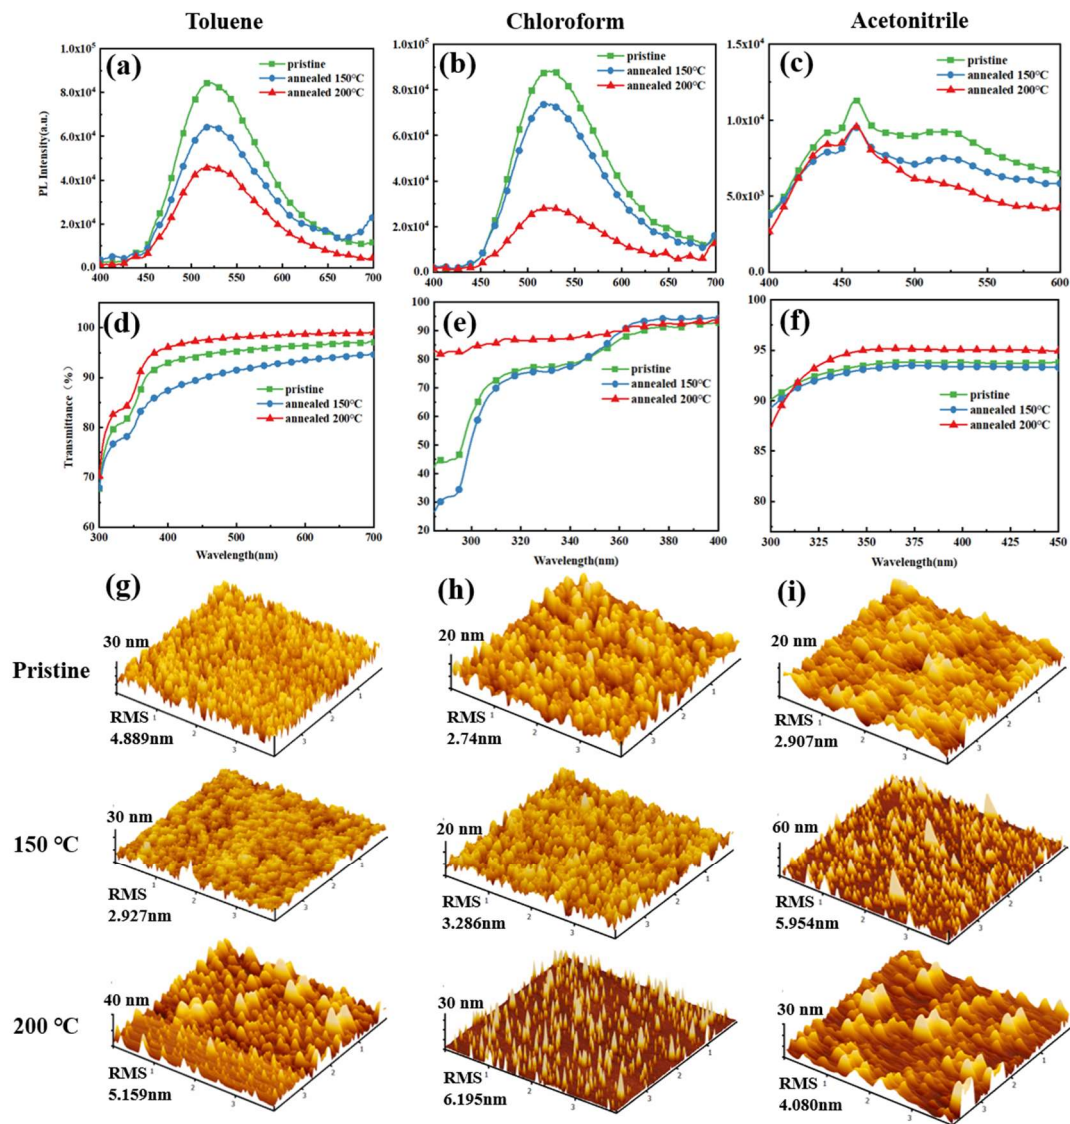

**Table S1.** Parameters of DpAn-InAc and DpAn-BzAc

| Materials | HOMO/LUMO<br>(eV) | $E_g$<br>(eV) | $\Delta E_{st}$<br>(eV) | $S_1$<br>(eV) | $T_1$<br>(eV) | $T_g/T_d/T_m$<br>(°C) |
|-----------|-------------------|---------------|-------------------------|---------------|---------------|-----------------------|
| DpAn-InAc | -4.72/-1.98       | 2.74          | 0.39                    | 3.47          | 3.08          | 132/330/250           |
| DpAn-BzAc | -5.04/-1.87       | 3.17          | 0.40                    | 3.48          | 3.08          | 118/370/249           |
